# Supplementary material
Source: PubMed Central journal article supplement (PMC6600806)

**Supplemental Table 1. Anatomic Outcomes in Eyes with Branch Vein Occlusion after Injection of a Dexamethasone Implant**

| <b>Patient ID</b> | <b>Age (years)</b> | <b>CST at Baseline (µm)</b> | <b>CST at Week 4 (µm)</b> | <b>Intraretinal fluid at Baseline</b> | <b>Intraretinal fluid at Week 4</b> | <b>RNP at baseline</b> | <b>Edema Duration (months)</b> | <b>Anti-VEGF injections</b> | <b>Months since last injection</b> |
|-------------------|--------------------|-----------------------------|---------------------------|---------------------------------------|-------------------------------------|------------------------|--------------------------------|-----------------------------|------------------------------------|
| B1                | 87                 | 337                         | 282                       | Moderate                              | Mild                                | Mild                   | 87                             | 3*                          | 2                                  |
| B2                | 89                 | 290                         | 241                       | Mild                                  | Minimal                             | Mild                   | 89                             | 5                           | 5                                  |
| B3                | 76                 | 508                         | 291                       | Severe                                | Mild                                | Moderate               | 76                             | 7                           | 9                                  |
| B4                | 85                 | 682                         | 257                       | Severe                                | Mild                                | Severe                 | 85                             | 2*                          | 6                                  |
| B5                | 80                 | 453                         | 379                       | Moderate                              | Mild                                | Mild                   | 80                             | -*                          | -*                                 |
| B6                | 54                 | 537                         | 337                       | Severe                                | Mild                                | Mild                   | 54                             | 1                           | 9                                  |
| B7                | 72                 | 350                         | 286                       | Mild                                  | None                                | Mild                   | 72                             | 28                          | 1                                  |
| B8                | 68                 | 712                         | 250                       | Severe                                | None                                | - <sup>^</sup>         | 68                             | 3                           | 1                                  |
| B9                | 59                 | 522                         | 329                       | Severe                                | Mild                                | Mild                   | 59                             | 36                          | 3                                  |
| B10               | 66                 | 792                         | 573                       | Severe                                | Moderate                            | Moderate               | 66                             | 30                          | 3                                  |
| B11               | 58                 | 438                         | 373                       | Severe                                | Moderate                            | - <sup>^</sup>         | 58                             | 26                          | 1                                  |
| B12               | 62                 | 305                         | 298                       | Mild                                  | Minimal                             | Moderate               | 62                             | 13                          | 1                                  |
| B13               | 73                 | 225                         | 206                       | Mild                                  | Minimal                             | Moderate               | 73                             | 2                           | 8                                  |
| B14               | 73                 | 580                         | 347                       | Severe                                | Mild                                | Severe                 | 72                             | 11                          | 1                                  |
| B15               | 70                 | 359                         | 324                       | Moderate                              | Minimal                             | Mild                   | 70                             | 25                          | 11                                 |
| B16               | 61                 | 370                         | 233                       | Moderate                              | Minimal                             | Mild                   | 61                             | 2                           | 2                                  |
| B17               | 74                 | 517                         | 263                       | Severe                                | Minimal                             | Mild                   | 74                             | 6                           | 2                                  |

\* Patient received treatment outside Johns Hopkins Hospital, the medical record for which is not available

<sup>^</sup> No gradable fluorescein angiogram

Abbreviations: ID = identifier, CST = central subfield thickness, µm = microns, RNP = retinal nonperfusion, VEGF = vascular endothelial growth factor

**Supplemental Table 2: Anatomic Outcomes in Eyes with Central Vein Occlusion after Injection of Dexamethasone Implant**

| <b>Patient ID</b> | <b>Age (years)</b> | <b>CST at Baseline (µm)</b> | <b>CST at Week 4 (µm)</b> | <b>Intraretinal fluid at Baseline</b> | <b>Intraretinal fluid at Week 4</b> | <b>RNP at baseline</b> | <b>Edema Duration (months)</b> | <b>Anti-VEGF injections</b> | <b>Months since last injection</b> |
|-------------------|--------------------|-----------------------------|---------------------------|---------------------------------------|-------------------------------------|------------------------|--------------------------------|-----------------------------|------------------------------------|
| C1                | 72                 | 251                         | 204                       | Moderate                              | None                                | Moderate               | 140                            | 26                          | 6                                  |
| C2                | 84                 | 692                         | 323                       | Severe                                | Mild                                | Severe                 | 82                             | 39                          | 8                                  |
| C3                | 59                 | 405                         | 336                       | Moderate                              | None                                | Mild                   | 39                             | 32                          | 5                                  |
| C4                | 90                 | 319                         | 266                       | Mild                                  | None                                | Mild                   | 94                             | 29                          | 11                                 |
| C5                | 81                 | 704                         | 263                       | Severe                                | None                                | Mild                   | 70                             | 14                          | 2                                  |
| C6                | 81                 | 450                         | 244                       | Moderate                              | None                                | Mild                   | 78                             | 2                           | 2                                  |
| C7                | 54                 | 617                         | 182                       | Severe                                | None                                | Moderate               | 46                             | 19                          | 3                                  |
| C8                | 66                 | 311                         | 248                       | Moderate                              | Minimal                             | Severe                 | 63                             | 41                          | 2                                  |
| C9                | 55                 | 699                         | 287                       | Severe                                | None                                | Mild                   | 2                              | 2                           | 1                                  |
| C10               | 78                 | 599                         | 301                       | Severe                                | None                                | Mild                   | 90                             | 37                          | 6                                  |
| C11               | 68                 | 398                         | 335                       | Moderate                              | Mild                                | Severe                 | 38                             | 30                          | 1                                  |
| C12               | 69                 | 431                         | 309                       | Moderate                              | None                                | Mild                   | 37                             | 18                          | 5                                  |
| C13               | 83                 | 777                         | 520                       | Severe                                | Moderate                            | Mild                   | 79                             | 11                          | 24                                 |
| C14               | 83                 | 539                         | 435                       | Severe                                | Moderate                            | Moderate               | 10                             | 4                           | 3                                  |
| C15               | 47                 | 455                         | 234                       | Severe                                | None                                | Mild                   | 45                             | 35                          | 2                                  |
| C16               | 58                 | 710                         | 263                       | Severe                                | None                                | Mild                   | 43                             | 26                          | 2                                  |
| C17               | 59                 | 840                         | 276                       | Severe                                | None                                | Mild                   | 10                             | 9                           | 1                                  |
| C18               | 87                 | 765                         | 282                       | Severe                                | None                                | ^                      | 11                             | -*                          | 4                                  |
| C19               | 74                 | 597                         | 285                       | Moderate                              | None                                | Mild                   | 14                             | 9                           | -*                                 |
| C20               | 74                 | 339                         | 281                       | Moderate                              | Mild                                | ^                      | 54                             | -*                          | -*                                 |
| C21               | 85                 | 941                         | 169                       | Severe                                | None                                | Severe                 | 6                              | 2                           | 2                                  |
| C22               | 77                 | 317                         | 254                       | Moderate                              | None                                | Moderate               | 17                             | 10                          | 4                                  |
| C23               | 86                 | 503                         | 354                       | Severe                                | Mild                                | ^                      | 57                             | 2                           | 2                                  |

\* Based upon history received several injections elsewhere but not documented

^ No gradable fluorescein angiogram

Abbreviations: ID = identifier, CST = central subfield thickness, µm = microns, RNP = retinal nonperfusion, VEGF = vascular endothelial growth factor

**Supplemental Table 3. Changes in Vasoactive Protein Levels 4 Weeks After Injection of Dexamethasone Implant in 11 Patients with Macular Edema Due to Branch Retinal Vein Occlusion**

| <b>Branch Retinal Vein Occlusion (BRVO)</b> |                    |                                                                                                                                                                                      |
|---------------------------------------------|--------------------|--------------------------------------------------------------------------------------------------------------------------------------------------------------------------------------|
| <b>Severe Edema, Complete Response</b>      |                    |                                                                                                                                                                                      |
| B3                                          | > 70 % decrease    | Angiopoietin-1, IGFBP-3, PD-ECGF, PDGF-AA                                                                                                                                            |
|                                             | 50 - 70 % decrease | Endostatin, CXCL-4, Thrombospondin-2                                                                                                                                                 |
|                                             | 30 - 50 % decrease | Activin-A, Artemin, EG-VEGF, IGFBP-2, Persephin                                                                                                                                      |
|                                             | 10 -30 % decrease  | DPP-IV, HB-EGF, HGF, IGFBP-1, Thrombospondin-1, VEGF-A, Angiogenin                                                                                                                   |
|                                             | No Change          | Angiostatin, Endothelin-1, Pentraxin 3, CXCL-16, TIMP-1                                                                                                                              |
|                                             | Undetected         | Leptin, Prolactin                                                                                                                                                                    |
|                                             | Increase           | Angiopoietin-2, MMP-9, PIGF, Serpin E1, Serpin F1, TIMP-4                                                                                                                            |
| B4                                          | > 70 % decrease    | Activin-A, HB-EGF, HGF, Leptin, MMP-9, CXCL-4                                                                                                                                        |
|                                             | 50 - 70 % decrease | IGFBP-1, VEGF-A                                                                                                                                                                      |
|                                             | 30 - 50 % decrease | Endostatin, IGFBP-3, Persephin, TIMP-4, IGFBP-2                                                                                                                                      |
|                                             | 10 -30 % decrease  | Angiogenin, CXCL-16, Serpin F1                                                                                                                                                       |
|                                             | No Change          | DPP-IV, Endothelin-1, TIMP-1                                                                                                                                                         |
|                                             | Undetected         | Angiostatin, Pentraxin 3, PD-ECGF, Prolactin, PDGF-AA, Thrombospondin-1, Thrombospondin-2, Angiopoietin-1, PIGF                                                                      |
|                                             | Increase           | Angiopoietin-2, Artemin, EG-VEGF, Serpin E1                                                                                                                                          |
| B8                                          | 10 -30 % decrease  | IGFBP-3, CXCL-16, TIMP-1                                                                                                                                                             |
|                                             | No Change          | Endostatin, IGFBP-2, VEGF-A, Angiogenin                                                                                                                                              |
|                                             | Undetected         | Angiopoietin-1, Angiostatin, Artemin, DPP-IV, HGF, Leptin, PD-ECGF, PIGF, Prolactin                                                                                                  |
|                                             | Increase           | Activin-A, Endothelin-1, IGFBP-1, MMP-9, CXCL-4, Serpin E1, Angiopoietin-2, EG-VEGF, HB-ECGF, Pentraxin 3, PDGF-AA, Thrombospondin-1, Thrombospondin-2, Persephin, Serpin F1, TIMP-4 |
| B17                                         | 50 - 70 % decrease | IGFBP-2                                                                                                                                                                              |
|                                             | 30 - 50 % decrease | HGF, IGFBP-1, IGFBP-3, Persephin, Serpin F1                                                                                                                                          |
|                                             | 10 -30 % decrease  | VEGF-A, CXCL-16                                                                                                                                                                      |
|                                             | No Change          | Endostatin, Angiogenin, TIMP-1                                                                                                                                                       |
|                                             | Undetected         | Angiostatin, Artemin, Endothelin-1, HB-EGF, Leptin, MMP-9, Pentraxin 3, PD-ECGF, PDGF-AA, CXCL-4, PIGF, Prolactin, Serpin E1, TIMP-4, Thrombospondin-1, Thrombospondin-2             |
|                                             | Increase           | Angiopoietin-1, Angiopoietin-2, DPP-IV, EG-VEGF, Activin-A                                                                                                                           |
| <b>Severe Edema, Partial Response</b>       |                    |                                                                                                                                                                                      |

|                                         |                    |                                                                                                                                                                                        |
|-----------------------------------------|--------------------|----------------------------------------------------------------------------------------------------------------------------------------------------------------------------------------|
| B6                                      | 50 - 70 % decrease | IGFBP-2, Persephin, CXCL-16                                                                                                                                                            |
|                                         | 30 - 50 % decrease | Activin-A, Endostatin, Endothelin-1, IGFBP-3                                                                                                                                           |
|                                         | 10 -30 % decrease  | Artemin, EG-VEGF, IGFBP-1, PDGF-AA, Angiogenin, TIMP-1                                                                                                                                 |
|                                         | No Change          | Angiostatin, VEGF-A, Serpin F1                                                                                                                                                         |
|                                         | Undetected         | DPP-IV, HB-EGF, HGF, Leptin, MMP-9, PD-ECGF, PIGF, CXCL-4, Prolactin, Serpin E1, TIMP-4, Thrombospondin-1                                                                              |
|                                         | Increase           | Angiopoietin-1, Angiopoietin-2, Thrombospondin-2, Pentraxin 3                                                                                                                          |
| B9                                      | > 70 % decrease    | VEGF-A                                                                                                                                                                                 |
|                                         | 50 - 70 % decrease | EG-VEGF                                                                                                                                                                                |
|                                         | 30 - 50 % decrease | TIMP-1                                                                                                                                                                                 |
|                                         | 10 -30 % decrease  | Endostatin, Endothelin-1, IGFBP-2, IGFBP-3                                                                                                                                             |
|                                         | No Change          | Activin-A, Persephin, Angiogenin, CXCL-16, Serpin F1                                                                                                                                   |
|                                         | Undetected         | HB-EGF, HGF, Leptin, MMP-9, Pentraxin 3, PD-ECGF, PDGF-AA, PIGF, Prolactin, Serpin E1, TIMP-4, Thrombospondin-2                                                                        |
|                                         | Increase           | Angiopoietin-1, Angiopoietin-2, Angiostatin, Artemin, CXCL-4, DPP-IV, Thrombospondin-1                                                                                                 |
| B14                                     | Undetected         | Angiopoietin-1, Angiopoietin-2, Angiostatin, Artemin, DPP-IV, Endothelin-1, HB-EGF, HGF, IGFBP-1, Leptin, Pentraxin 3, PD-ECGF, PDGF-AA, Persephin, CXCL-4, PIGF, Prolactin, Serpin F1 |
|                                         | Increase           | Angiogenin, TIMP-1, TIMP-4, Activin-A, EG-VEGF, Endostatin, IGFBP-2, IGFBP-3, MMP-9, Serpin E1, VEGF-A, CXCL-16, Thrombospondin-1, Thrombospondin-2                                    |
| <b>Moderate Edema, Partial Response</b> |                    |                                                                                                                                                                                        |
| B1                                      | > 70 % decrease    | Angiostatin, EG-VEGF, MMP-9, Pentraxin 3, PDGF-AA, Persephin                                                                                                                           |
|                                         | 50 - 70 % decrease | Activin-A, Angiopoietin-2, Artemin, Endostatin, IGFBP-3, VEGF-A                                                                                                                        |
|                                         | 30 - 50 % decrease | Endothelin-1, HGF, IGFBP-1, IGFBP-2, TIMP-4, PD-ECGF, CXCL-16, Thrombospondin-1, Thrombospondin-2                                                                                      |
|                                         | 10 -30 % decrease  | DPP-IV, Serpin F1                                                                                                                                                                      |
|                                         | No Change          | Angiogenin, TIMP-1                                                                                                                                                                     |
|                                         | Undetected         | Angiopoietin-1, HB-EGF, Leptin, CXCL-4, PIGF, Prolactin                                                                                                                                |
|                                         | Increase           | Serpin E1                                                                                                                                                                              |
| B15                                     | > 70 % decrease    | Artemin                                                                                                                                                                                |
|                                         | 30 - 50 % decrease | Persephin                                                                                                                                                                              |
|                                         | 10 -30 % decrease  | Endothelin-1, IGFBP-1, Serpin F1                                                                                                                                                       |
|                                         | Undetected         | Angiopoietin-1, Angiostatin, DPP-IV, Endostatin, HGF, IGFBP-2, IGFBP-3, Leptin, MMP-9, Pentraxin 3, PD-ECGF, PDGF-AA, CXCL-4, PIGF, Prolactin, Thrombospondin-1,                       |

|                                      |                    |                                                                                                                                           |
|--------------------------------------|--------------------|-------------------------------------------------------------------------------------------------------------------------------------------|
|                                      |                    | Thrombospondin-2, CXCL-16                                                                                                                 |
|                                      | Increase           | Activin A, Angiopoietin-2, EG-VEGF, Angiogenin, TIMP-1, Serpin E1, TIMP-4, VEGF-A                                                         |
| B16                                  | > 70 % decrease    | EG-VEGF, HB-EGF                                                                                                                           |
|                                      | 50 - 70 % decrease | Angiopoietin-1, Endostatin, IGFBP-2, CXCL-16                                                                                              |
|                                      | 30 - 50 % decrease | Activin-A, HGF, IGFBP-1, IGFBP-3, Persephin                                                                                               |
|                                      | 10 -30 % decrease  | DPP-IV, Endothelin-1, VEGF-A, Angiogenin, TIMP-1                                                                                          |
|                                      | No Change          | Artemin                                                                                                                                   |
|                                      | Undetected         | Angiostatin, Leptin, MMP-9, Pentraxin 3, PD-ECGF, PDGF-AA, CXCL-4, PIGF, Prolactin, Serpin E1, TIMP-4, Thrombospondin-1, Thrombospondin-2 |
|                                      | Increase           | Angiopoietin-2, Serpin F1                                                                                                                 |
| <b>Mild Edema, Complete response</b> |                    |                                                                                                                                           |
| B2                                   | > 70 % decrease    | Angiostatin, HGF, IGFBP-3                                                                                                                 |
|                                      | 50 - 70 % decrease | Activin-A, Endostatin, Persephin                                                                                                          |
|                                      | 30 - 50 % decrease | IGFBP-2, TIMP-4, VEGF-A                                                                                                                   |
|                                      | 10 -30 % decrease  | EG-VEGF, Endothelin, IGFBP-1, Angiogenin, CXCL-16, Serpin F1                                                                              |
|                                      | No Change          | TIMP-1                                                                                                                                    |
|                                      | Undetected         | Angiopoietin-1, HB-EGF, MMP-9, Pentraxin 3, PD-ECGF, PDGF-AA, CXCL-4, PIGF, Prolactin, Thrombospondin-1, Thrombospondin-2                 |
|                                      | Increase           | Artemin, DPP-IV, Serpin E1, Angiopoietin-2, Leptin                                                                                        |

Abbreviations: IGFBP = insulin-like growth factor binding protein, PD-ECGF = platelet-derived endothelial cell growth factor, PDGF = platelet-derived growth factor, CXCL4 = C-X-C motif ligand 4, EG-VEGF = endocrine gland-vascular endothelial growth factor, DPP-IV = dipeptidyl peptidase-4, HB-EGF = heparin binding-epidermal growth factor, HGF = hepatocyte growth factor, VEGF = vascular endothelial growth factor, CXCL16 = C-X-C motif ligand 16, TIMP = tissue inhibitor of metalloproteinases, MMP = matrix metalloproteinase, PIGF = placental growth factor

**Supplemental Table 4. Changes in Vasoactive Protein Levels 4 Weeks After Injection of Dexamethasone Implant in 11 Patients with Macular Edema Due to Central Retinal Vein Occlusion**

| <b>Central Retinal Vein Occlusion (CRVO)</b> |                    |                                                                                                                                                  |
|----------------------------------------------|--------------------|--------------------------------------------------------------------------------------------------------------------------------------------------|
| <b>Severe Edema, Complete Response</b>       |                    |                                                                                                                                                  |
| C5                                           | 50 - 70 % decrease | MMP-9, PD-ECGF, PDGF-AA                                                                                                                          |
|                                              | 30 - 50 % decrease | EG-VEGF, HB-EGF, IGFBP-1, CXCL-4                                                                                                                 |
|                                              | 10 -30 % decrease  | Angiopoietin-2, Angiostatin, DPP-IV, HGF, Pentraxin 3, Serpin F1                                                                                 |
|                                              | No Change          | Activin-A, Angiopoietin-1, Endothelin-1, IGFBP-2, IGFBP-3, Persephin, VEGF-A, Thrombospondin-2, Angiogenin, CXCL-16, TIMP-1                      |
|                                              | Undetected         | Leptin                                                                                                                                           |
|                                              | Increase           | Artemin, PIGF, Prolactin, Serpin E1, TIMP-4, Thrombospondin-1                                                                                    |
| C7                                           | > 70 % decrease    | DPP-IV, HGF, MMP-9                                                                                                                               |
|                                              | 50 - 70 % decrease | Angiopoietin-1, HB-EGF, IGFBP-3                                                                                                                  |
|                                              | 30 - 50 % decrease | EG-VEGF, Endostatin, Endothelin-1, IGFBP-1, IGFBP-2                                                                                              |
|                                              | 10 -30 % decrease  | Activin-A, Angiopoietin-2, Artemin, PDGF-AA, Persephin, VEGF-A, Angiogenin, CXCL-16, TIMP-1                                                      |
|                                              | No Change          | Angiostatin, PD-ECGF, CXCL-4, Serpin F1                                                                                                          |
|                                              | Undetected         | Leptin, Thrombospondin-1, Thrombospondin-2                                                                                                       |
|                                              | Increase           | PIGF, Prolactin, Serpin E1, TIMP-4, Pentraxin 3                                                                                                  |
| C21                                          | > 70 % decrease    | DPP-IV                                                                                                                                           |
|                                              | 50 - 70 % decrease | IGFBP-1                                                                                                                                          |
|                                              | 30 - 50 % decrease | IGFBP-2, IGFBP-3                                                                                                                                 |
|                                              | 10 -30 % decrease  | Activin-A, Endostatin, CXCL-16                                                                                                                   |
|                                              | No Change          | Angiostatin, VEGF-A, Angiogenin, TIMP-1                                                                                                          |
|                                              | Undetected         | Angiopoietin-1, Artemin, HB-EGF, HGF, Leptin, Pentraxin 3, PD-ECGF, PDGF-AA, CXCL-4, PIGF, Serpin E1, TIMP-4, Thrombospondin-1, Thrombospondin-2 |
|                                              | Increase           | EG-VEGF, Endothelin-1, MMP-9, Persephin, Serpin F1, Angiopoietin-2                                                                               |
| <b>Severe Edema, Partial Response</b>        |                    |                                                                                                                                                  |
| C2                                           | > 70 % decrease    | Thrombospondin-1                                                                                                                                 |
|                                              | 50 - 70 % decrease | HGF, MMP-9, CXCL-16                                                                                                                              |
|                                              | 10 -30 % decrease  | Angiopoietin-2, Endostatin, IGFBP-3                                                                                                              |
|                                              | No Change          | EG-VEGF, IGFBP-2, Leptin, Angiogenin, TIMP-1                                                                                                     |
|                                              | Undetected         | Angiopoietin-1, HB-EGF, Pentraxin 3, PD-ECGF, PDGF-AA, CXCL-4, PIGF, Prolactin, Serpin E1, TIMP-4, Thrombospondin-2                              |
|                                              | Increase           | DPP-IV, Endothelin-1, IGFBP-1, Persephin, VEGF-A, Artemin, Activin-A, Angiostatin, Serpin F1                                                     |
| C23                                          | > 70 % decrease    | EG-VEGF, Endothelin-1, HB-EGF, HGF, IGFBP-1, MMP-9,                                                                                              |

|                                          |                    |                                                                                                                 |
|------------------------------------------|--------------------|-----------------------------------------------------------------------------------------------------------------|
|                                          |                    | Thrombospondin-1                                                                                                |
|                                          | 50 - 70 % decrease | Activin-A, Endostatin, IGFBP-2, Pentraxin 3, PDGF-AA, CXCL-16                                                   |
|                                          | 30 - 50 % decrease | Thrombospondin-2                                                                                                |
|                                          | 10 - 30 % decrease | IGFBP-3, Persephin, Angiogenin                                                                                  |
|                                          | No Change          | Angiostatin, VEGF-A, Serpin F1, TIMP-1                                                                          |
|                                          | Undetected         | Angiopoietin-1, Artemin, DPP-IV, Leptin, PD-ECGF, CXCL-4, Prolactin, Serpin E1, TIMP-4, PIGF                    |
|                                          | Increase           | Angiopoietin-2                                                                                                  |
| <b>Moderate Edema, Complete Response</b> |                    |                                                                                                                 |
| C1                                       | > 70 % decrease    | Activin-A, Angiostatin, Endostatin, HGF, Pentraxin 3, Persephin, Thrombospondin-1, Thrombospondin-2, Serpin F1  |
|                                          | 50 - 70 % decrease | CXCL-16                                                                                                         |
|                                          | 30 - 50 % decrease | IGFBP-2, IGFBP-3                                                                                                |
|                                          | 10 - 30 % decrease | Angiopoietin-2, Endothelin-1, IGFBP-1, Leptin, VEGF-A, TIMP-1                                                   |
|                                          | No Change          | DPP-IV, PDGF-AA, Angiogenin                                                                                     |
|                                          | Undetected         | Angiopoietin-1, HB-EGF, MMP-9, PD-ECGF, CXCL-4, PIGF, Prolactin, Serpin E1, TIMP-4                              |
|                                          | Increase           | Artemin                                                                                                         |
| C3                                       | > 70 % decrease    | Angiopoietin-1, IGFBP-3, Leptin                                                                                 |
|                                          | 50 - 70 % decrease | Activin-A , Angiostatin, EG-VEGF , HGF, IGFBP-1                                                                 |
|                                          | 30 - 50 % decrease | DPP-IV, Endostatin, CXCL-4, CXCL-16                                                                             |
|                                          | 10 - 30 % decrease | IGFBP-2 , MMP-9 , Angiogenin                                                                                    |
|                                          | No Change          | PD-ECGF, Thrombospondin-1, TIMP-1                                                                               |
|                                          | Undetected         | Pentraxin 3, PDGF-AA, Thrombospondin-2                                                                          |
|                                          | Increase           | Angiopoietin-2, Artemin, Endothelin-1, HB-EGF, Persephin, PIGF, Prolactin, Serpin E1, Serpin F1, TIMP-4, VEGF-A |
| C6                                       | > 70 % decrease    | IGFBP-3, Pentraxin 3, PDGF-AA, Thrombospondin-1, Thrombospondin-2                                               |
|                                          | 50 - 70 % decrease | Angiopoietin-1, Endostatin, HB-EGF, MMP-9, PD-ECGF                                                              |
|                                          | 30 - 50 % decrease | EG-VEGF, HGF, IGFBP-2, PIGF, Prolactin, Serpin E1, TIMP-4                                                       |
|                                          | 10 - 30 % decrease | Angiostatin, IGFBP-2, Pentraxin 3, Persephin, CXCL-16                                                           |
|                                          | No Change          | Angiopoietin-1, VEGF-A, Angiogenin, TIMP-1                                                                      |
|                                          | Undetected         | Leptin                                                                                                          |
|                                          | Increase           | Activin-A, Serpin F1                                                                                            |
| C8                                       | > 70 % decrease    | HB-EGF                                                                                                          |
|                                          | 50 - 70 % decrease | EG-VEGF, Endostatin, HGF, IGFBP-3, MMP-9, PDGF-AA, Thrombospondin-1                                             |
|                                          | 30 - 50 % decrease | Activin-A, DPP-IV, IGFBP-1, PD-ECGF, CXCL-4, Thrombospondin-2                                                   |
|                                          | 10 - 30 % decrease | Angiostatin, IGFBP-2, Pentraxin 3, Persephin, CXCL-16                                                           |
|                                          | No Change          | Angiopoietin-1, VEGF-A, Angiogenin, TIMP-1                                                                      |

|                                      |                    |                                                                                                                                                                                   |
|--------------------------------------|--------------------|-----------------------------------------------------------------------------------------------------------------------------------------------------------------------------------|
|                                      | Undetected         | Leptin                                                                                                                                                                            |
|                                      | Increase           | Angiopoietin-2, Artemin, Endothelin-1, Serpin E1, Serpin F1, PIGF, Prolactin, TIMP-4                                                                                              |
| C22                                  | 50 - 70 % decrease | CXCL-16                                                                                                                                                                           |
|                                      | 30 - 50 % decrease | Endostatin, IGFBP-1                                                                                                                                                               |
|                                      | 10 -30 % decrease  | EG-VEGF, IGFBP-2, IGFBP-3                                                                                                                                                         |
|                                      | No Change          | Angiostatin, Angiogenin, TIMP-1                                                                                                                                                   |
|                                      | Undetected         | Angiopoietin-1, Artemin, DPP-IV, Endothelin-1, HB-EGF, HGF, Leptin, Pentraxin 3, PDGF-AA, PD-ECGF, CXCL-4, PIGF, Prolactin, Serpin E1, TIMP-4, Thrombospondin-1, Thrombospondin-2 |
|                                      | Increase           | Activin-A, Angiopoietin-2, MMP-9, VEGF-A, Serpin F1                                                                                                                               |
| <b>Mild Edema, Complete response</b> |                    |                                                                                                                                                                                   |
| C4                                   | > 70 % decrease    | Angiopoietin-1, PD-ECGF                                                                                                                                                           |
|                                      | 30 - 50 % decrease | Leptin, CXCL-16                                                                                                                                                                   |
|                                      | 10 -30 % decrease  | Angiopoietin-2, Angiostatin, Endostatin, HGF, IGFBP-3, PDGF-AA, Persephin                                                                                                         |
|                                      | No Change          | Artemin, IGFBP-2, CXCL-4, TIMP-1                                                                                                                                                  |
|                                      | Increase           | DPP-IV, EG-VEGF, Endothelin-1, IGFBP-1, MMP-9, Pentraxin 3, PIGF, Prolactin, Serpin E1, Serpin F1, TIMP-4, Thrombospondin-1, Thrombospondin-2, Activin-A, HB-EGF, VEGF-A          |

Abbreviations: IGFBP = insulin-like growth factor binding protein, PD-ECGF = platelet-derived endothelial cell growth factor, PDGF = platelet-derived growth factor, CXCL4 = C-X-C motif ligand 4, EG-VEGF = endocrine gland-vascular endothelial growth factor, DPP-IV = dipeptidyl peptidase-4, HB-EGF = heparin binding-epidermal growth factor, HGF = hepatocyte growth factor, VEGF = vascular endothelial growth factor, CXCL16 = C-X-C motif ligand 16, TIMP = tissue inhibitor of metalloproteinases, MMP = matrix metalloproteinase, PIGF = placental growth factor,



**Supplemental Table 5. Aqueous Levels of Hepatocyte Growth Factor and Vascular Endothelial Growth Factor Before and After Injection of Dexamethasone Implant in Patients with Branch Retinal Vein Occlusion**

| Subject ID | Disease Duration (months) | Retinal Non-perfusion | Visit              | HGF (pg/ml)   | VEGF (pg/ml)   | CST (µm) | Intra-retinal fluid | BCVA (Letter Score) |
|------------|---------------------------|-----------------------|--------------------|---------------|----------------|----------|---------------------|---------------------|
| B5         | 41                        | Mild                  | Day 0              | 270           | 49.7           | 453      | Moderate            | 60                  |
|            |                           |                       | WEEK 4 (% change)  | 215 (-20.4%)  | 22.5 (-54.7%)  | 379      | Moderate            | 60                  |
|            |                           |                       | WEEK 16 (% change) | 255 (+18.6%)  | 15.2 (-32.5%)  | 330      | Moderate            | 59                  |
| B7         | 34                        | Mild                  | DAY 0              | 99            | 71.4           | 350      | Mild                | 60                  |
|            |                           |                       | WEEK 4 (% change)  | 284 (+186.9%) | 45.0 (-37.0 %) | 286      | None                | 64                  |
| B10        | 42                        | Moderate              | DAY 0              | 400           | 40.8           | 792      | Severe              | 49                  |
|            |                           |                       | WEEK 4 (% change)  | 144 (-64.0%)  | 43.7 (+7.1%)   | 573      | Moderate            | 64                  |
|            |                           |                       | WEEK 16 (% change) | 165 (+14.6%)  | 65.2 (49.2%)   | 494      | Moderate            | 62                  |
| B11        | 39                        | -                     | DAY 0              | 67            | 20.1           | 438      | Moderate            | 70                  |
|            |                           |                       | WEEK 4 (% change)  | 53 (-20.9%)   | 16.2 (-19.4%)  | 373      | Moderate            | 77                  |
| B12        | 25                        | Moderate              | DAY 0              | 194           | 140            | 305      | Mild                | 54                  |
|            |                           |                       | WEEK 4 (% change)  | 110 (-43.3%)  | 36.2 (-74.2%)  | 298      | Minimal             | 63                  |
|            |                           |                       | WEEK 16 (% change) | 150 (+36.4%)  | not detected   | 310      | Mild                | 70                  |
| B13        | 109                       | Moderate              | DAY 0              | 247           | 55.8           | 225      | Mild                | 65                  |
|            |                           |                       | WEEK 4 (% change)  | 179 (-27.5%)  | 45.6 (-18.3%)  | 206      | Minimal             | 63                  |

\*No gradable FA

Abbreviations: HGF = hepatocyte growth factor, VEGF = vascular endothelial growth factor, CST = center subfield thickness, BCVA = best-corrected visual acuity

**Supplemental Table 6. Aqueous Levels of Hepatocyte Growth Factor and Vascular Endothelial Growth Factor Before and After Injection of a Dexamethasone Implant in Patients with Central Retinal Vein Occlusion**

| Subject ID | Disease Duration (months) | Retinal Non-perfusion | Visit              | HGF (pg/ml)    | VEGF (pg/ml)    | CFT (µm) | Intra-retinal fluid | BCVA (Letter Score) |
|------------|---------------------------|-----------------------|--------------------|----------------|-----------------|----------|---------------------|---------------------|
| C9         | 2                         | Mild                  | DAY 0              | 178            | 88.2            | 699      | Severe              | 62                  |
|            |                           |                       | WEEK 4 (% change)  | 170 (-4.7%)    | 63.2 (-28.5%)   | 287      | None                | 76                  |
|            |                           |                       | WEEK 16 (% change) | 200 (+17.6%)   | 58.9 (-6.9%)    | 605      | Moderate            | 63                  |
| C10        | 89                        | Mild                  | DAY 0              | 140            | 54.0            | 599      | Severe              | 65                  |
|            |                           |                       | WEEK 4 (% change)  | 71 (-49.2%)    | - <sup>^</sup>  | 301      | None                | 67                  |
|            |                           |                       | WEEK 16 (% change) | 112 (+57.7%)   | 55.2            | 562      | Moderate            | 60                  |
| C11        | 54                        | Severe                | DAY 0              | 200            | 170.6           | 398      | Moderate            | 54                  |
|            |                           |                       | WEEK 4 (% change)  | 173 (-13.7%)   | 185.7 (-7.6%)   | 335      | Mild                | 56                  |
|            |                           |                       | WEEK 16 (% change) | 162 (-6.4%)    | 147.0 (-20.8%)  | 328      | Mild                | 54                  |
| C12        | 37                        | Mild                  | DAY 0              | 52             | 48.3            | 431      | Moderate            | 76                  |
|            |                           |                       | WEEK 4 (% change)  | 54 (+4.5%)     | 15.2 (-68.6%)   | 309      | None                | 81                  |
|            |                           |                       | WEEK 16 (% change) | 117 (+116.7 %) | 15.7 (+3.3%)    | 285      | None                | 79                  |
| C13        | 20                        | Mild                  | DAY 0              | 194            | 97.4            | 777      | Severe              | 77                  |
|            |                           |                       | WEEK 4 (% change)  | 67 (-65.3%)    | 51.6 (-47.0%)   | 520      | Moderate            | 78                  |
| C14        | 10                        | Moderate              | DAY 0              | 203            | 43.0            | 539      | Severe              | 22                  |
|            |                           |                       | WEEK 4 (% change)  | 261 (+28.6%)   | 124.0 (+187.3%) | 435      | Moderate            | 27                  |
|            |                           |                       | WEEK 16 (% change) | 312 (+19.5%)   | 74.7 (-39.8%)   | 1146     | Severe              | 30                  |
| C15        | 45                        | Mild                  | DAY 0              | 85             | 74.7            | 455      | Severe              | 68                  |
|            |                           |                       | WEEK 4 (% change)  | 154 (+80.1%)   | 47.1 (-36.9%)   | 234      | None                | 70                  |
|            |                           |                       | WEEK 16 (% change) | 161 (+4.5%)    | 94.6 (+100.8%)  | 265      | Moderate            | 84                  |
| C16        | 43                        | Mild                  | DAY 0              | 83             | 79.3            | 710      | Severe              | 43                  |
|            |                           |                       | WEEK 4 (% change)  | 94 (+13.2%)    | 47.3 (-40.4%)   | 263      | None                | 44                  |
|            |                           |                       | WEEK 16 (% change) | 133 (+41.5%)   | 86.4 (+82.7%)   | 525      | Moderate            | 47                  |
| C17        | 62                        | Mild                  | DAY 0              | 107            | 88.0            | 840      | Severe              | 62                  |
|            |                           |                       | WEEK 4 (% change)  | 67 (-37.0%)    | 172.7 (+96.0%)  | 276      | None                | 70                  |

|     |    |      |                    |              |                 |     |          |    |
|-----|----|------|--------------------|--------------|-----------------|-----|----------|----|
|     |    |      | WEEK 16 (% change) | 97 (+44.8%)  | 129.4 (-25.1%)  | 659 | Moderate | 60 |
| C18 | 10 | -    | DAY 0              | 176          | 148.8           | 765 | Severe   | 21 |
|     |    |      | WEEK 4 (% change)  | 129 (-27.0%) | 389.2 (+162.0%) | 282 | None     | 31 |
| C19 | 13 | Mild | DAY 0              | 137          | 28.6            | 597 | Moderate | 59 |
|     |    |      | WEEK 4 (% change)  | 85 (-38.3%)  | 68.8 (+140.6%)  | 285 | None     | 72 |
| C20 | 53 | -    | DAY 0              | 196          | 118.0           | 339 | Moderate | 61 |
|     |    |      | WEEK 4 (% change)  | 141 (-28.1%) | 116.4 (-1.4%)   | 281 | Mild     | 73 |

\*No gradable FA

^ Not Detectable

Abbreviations: HGF = hepatocyte growth factor, VEGF = vascular endothelial growth factor, CST = center subfield thickness, BCVA = best-corrected visual acuity

**Supplemental Figure 1. Foveal horizontal spectral domain-optical coherence tomography scans at each study visit for patients with branch retinal vein occlusion who received a dexamethasone implant.**

Horizontal scans through the fovea at each study visit are shown for 17 patients with branch vein occlusion (B1-B17), divided into 4 images: (1) B1-B5, (2) B6-B10, (3) B11-B15, and (4) B16-B17. Visits at which a dexamethasone implant was injected are indicated by Dex in the lower right of the box and visits at which an anti-vascular endothelial growth factor (anti-VEGF) injection was given are indicated by anti-VEGF in the lower right of the box. The central subfield thickness is shown in the upper left and the best-corrected visual acuity in Early Treatment Diabetic Retinopathy Study letter score is shown in the upper right of each box. Blank boxes indicate a missed visit.

**Supplemental Figure 2. Foveal horizontal spectral domain-optical coherence tomography scans at each study visit for patients with central retinal vein occlusion who received a dexamethasone implant.**

Horizontal scans through the fovea at each study visit are shown for 23 patients with central vein occlusion (C1-C23), divided into 5 images: (1) C1-C5, (2) C6-B10, (3) C11- C15, and (4) C16- C20, and (5) C21-C23. Visits at which a dexamethasone implant was injected are indicated by Dex in the lower right of the box and visits at which an anti-vascular endothelial growth factor (anti-VEGF) injection was given are indicated by anti-VEGF in the lower right of the box. The central subfield thickness is shown in the upper left and the best-corrected visual acuity in Early Treatment Diabetic Retinopathy Study letter score is shown in the upper right of each box. Blank boxes indicate a missed visit.

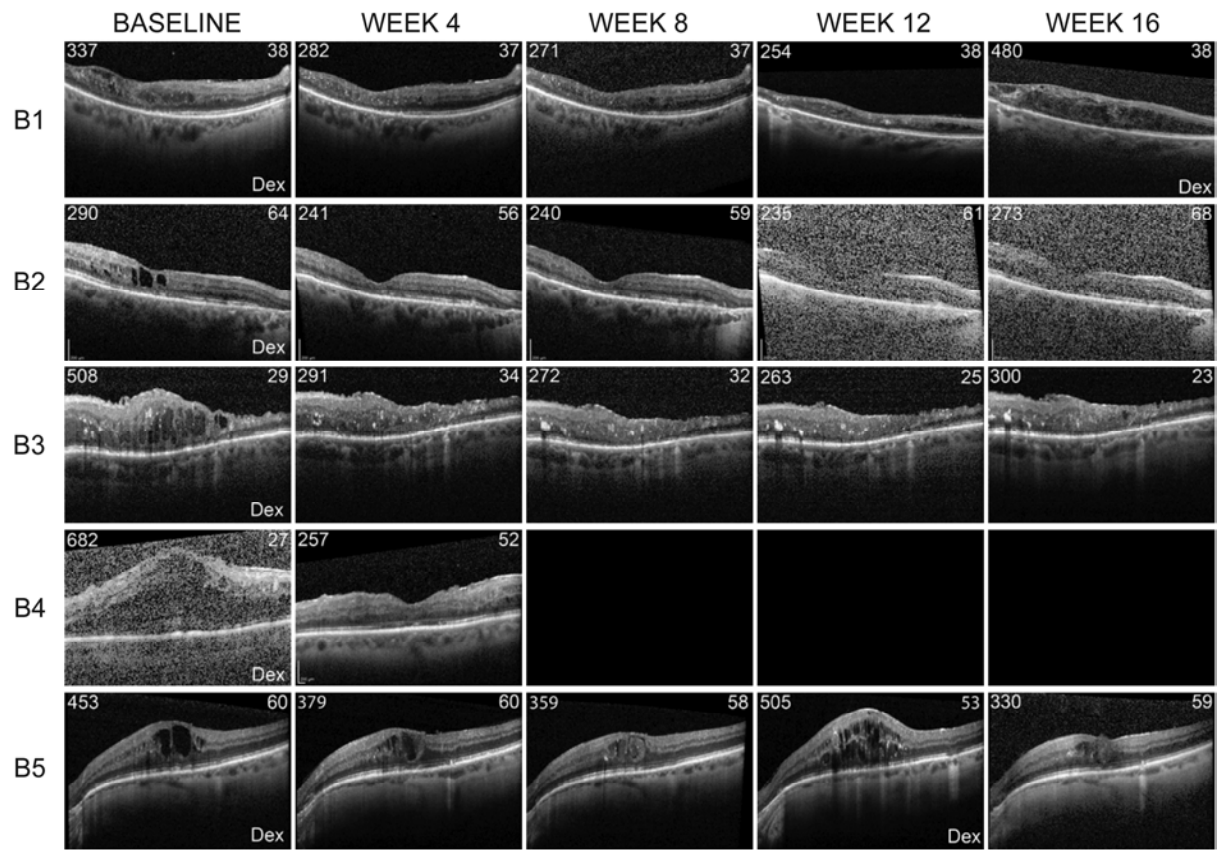

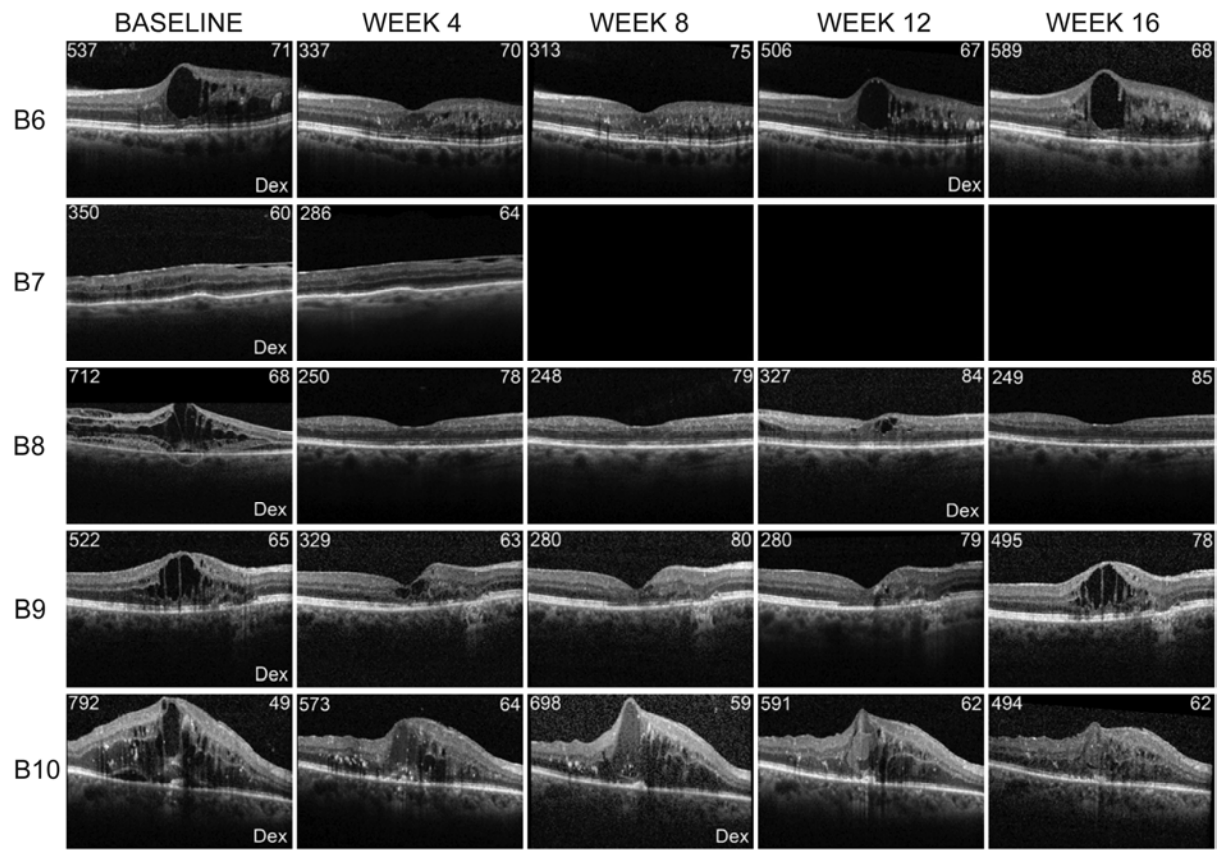

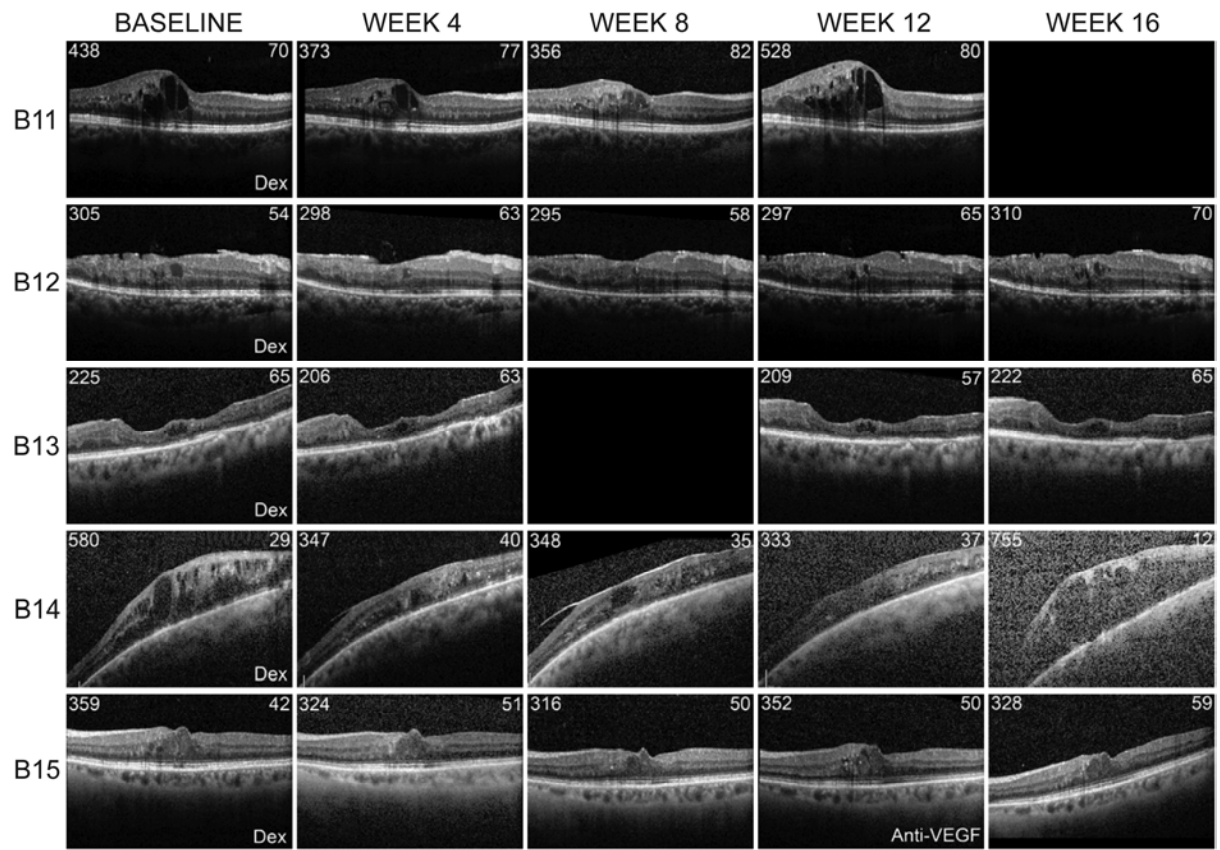

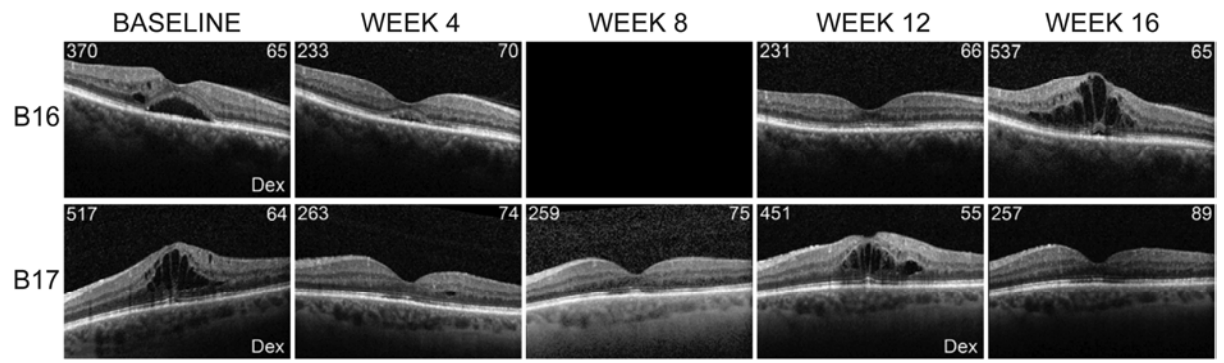



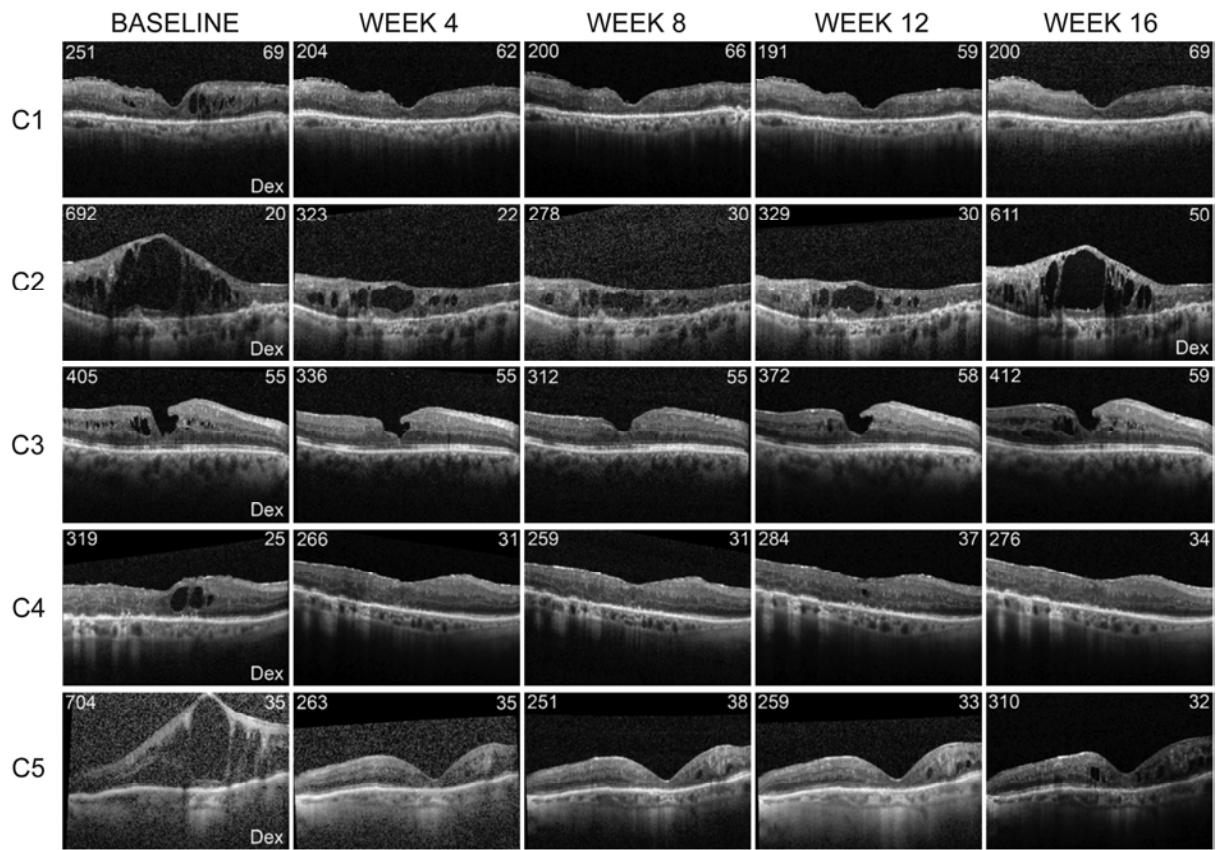

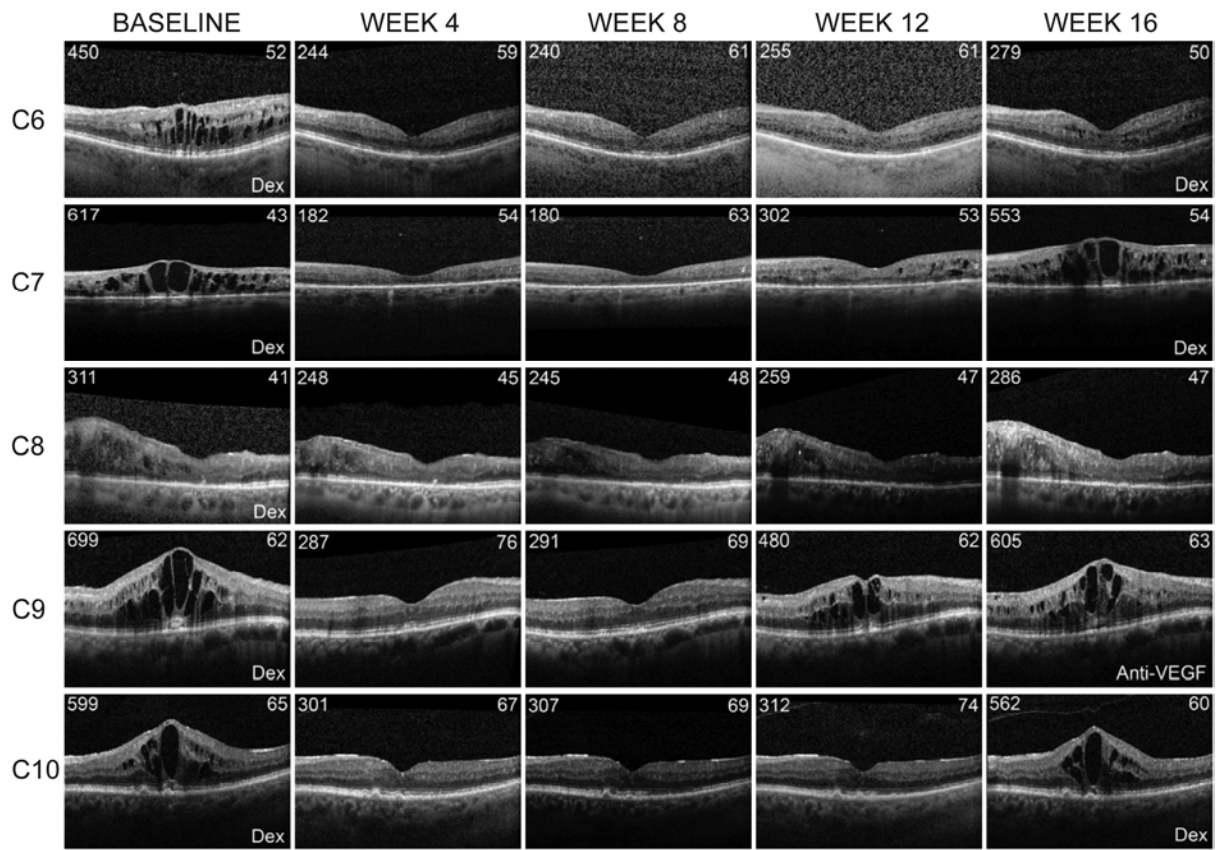

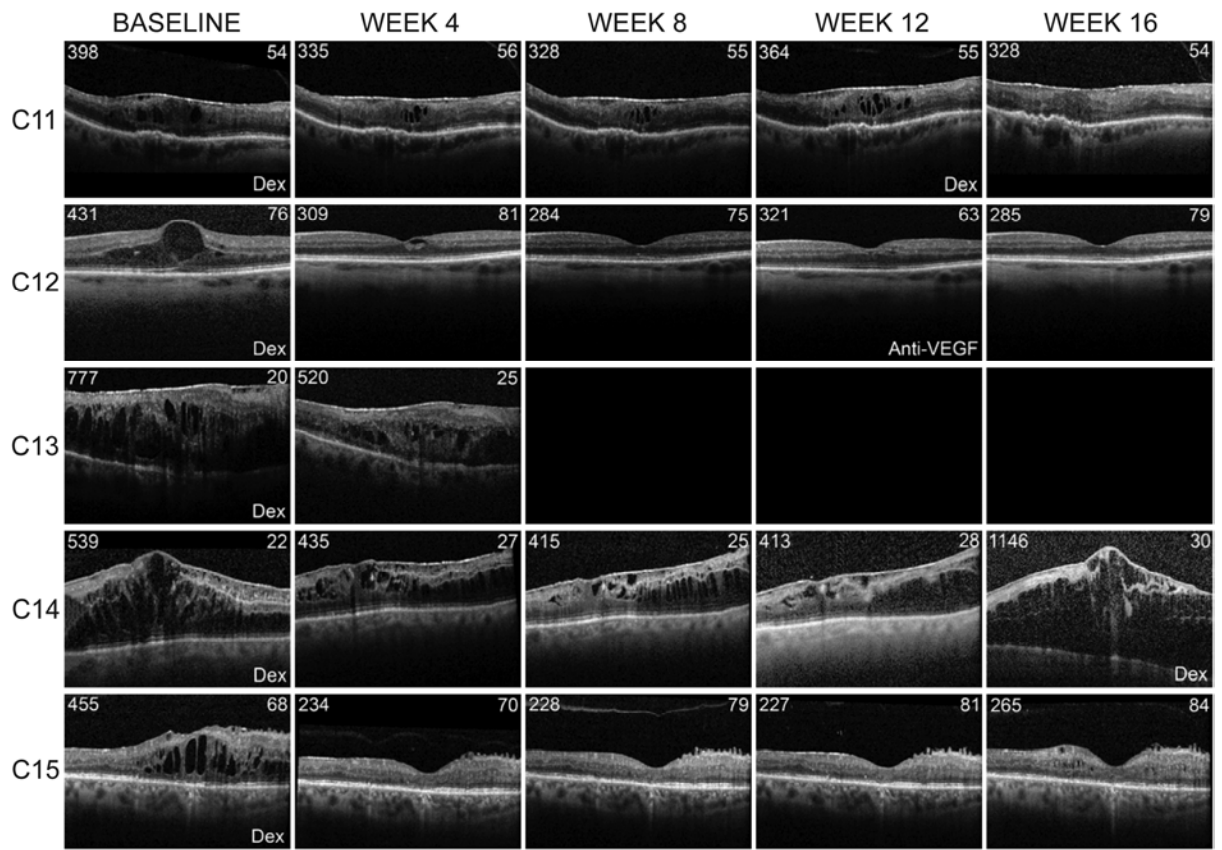

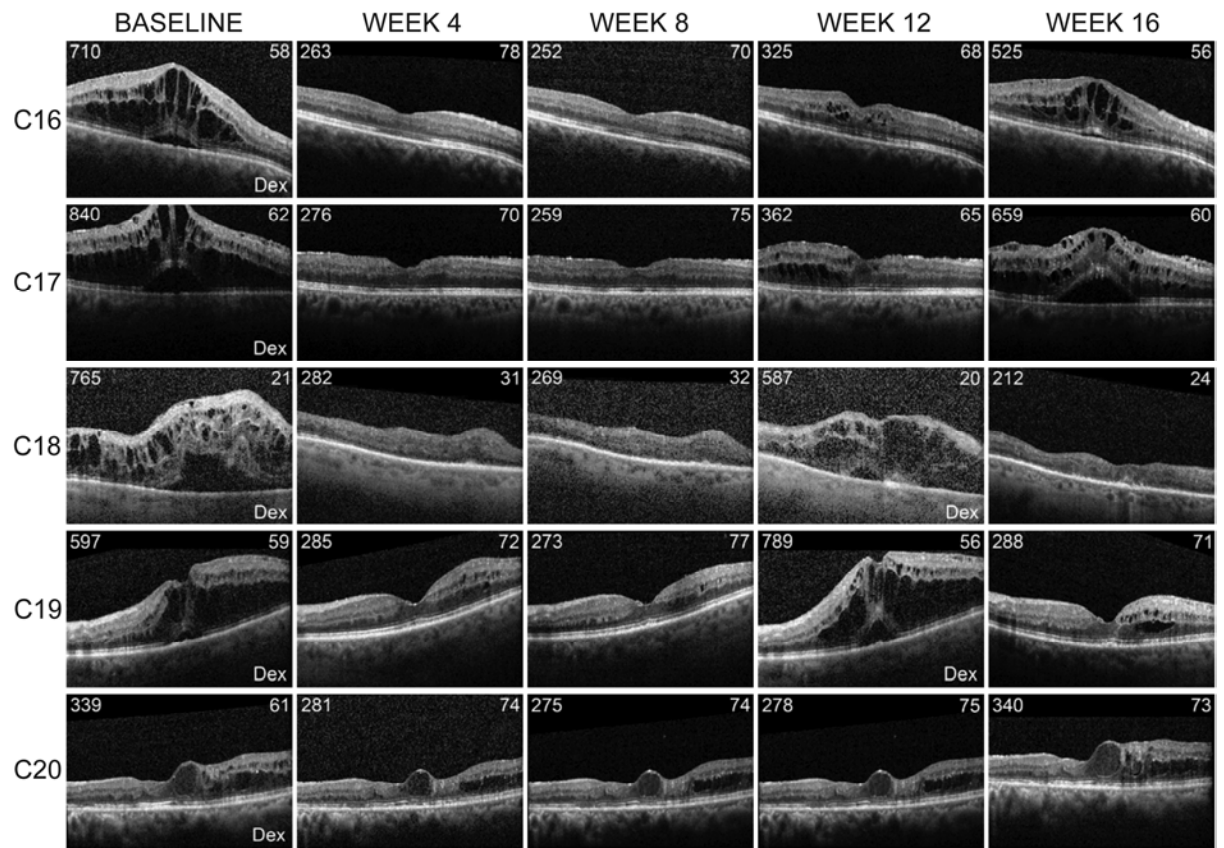

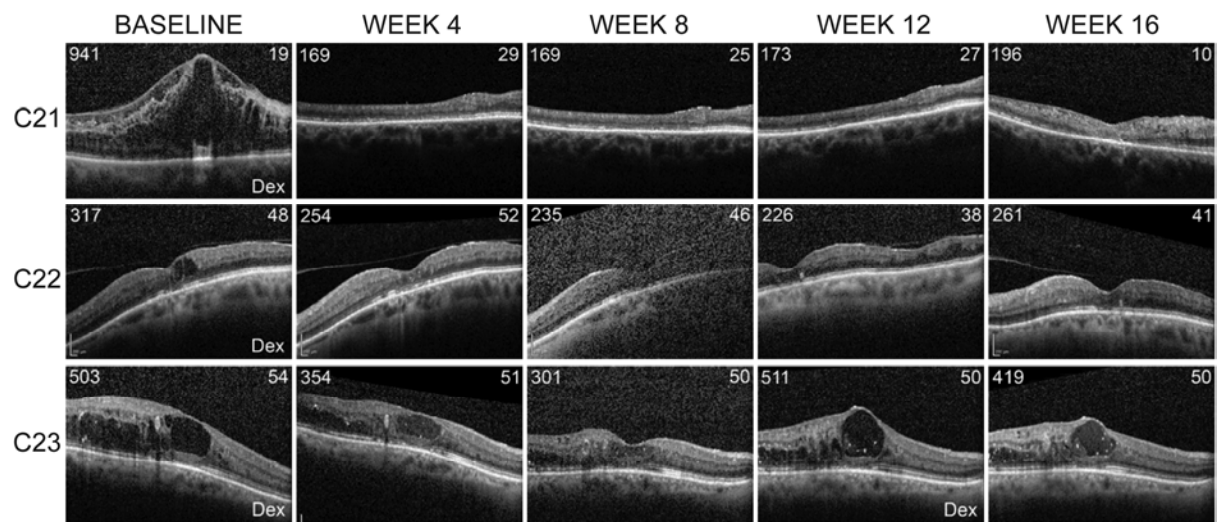

Supplement: NIHMS1530866-supplement-1.pdf [file NIHMS1530866-supplement-1.pdf]
